# Supplementary material
Source: MDPI journal article supplement (https://www.mdpi.com/2073-4433/11/1/41)
Supplement: s1 [file s1]

## Supplementary Material

# Indoor Particle Concentrations, Size Distributions, and Exposures in Middle Eastern Microenvironments

Hussein et al.

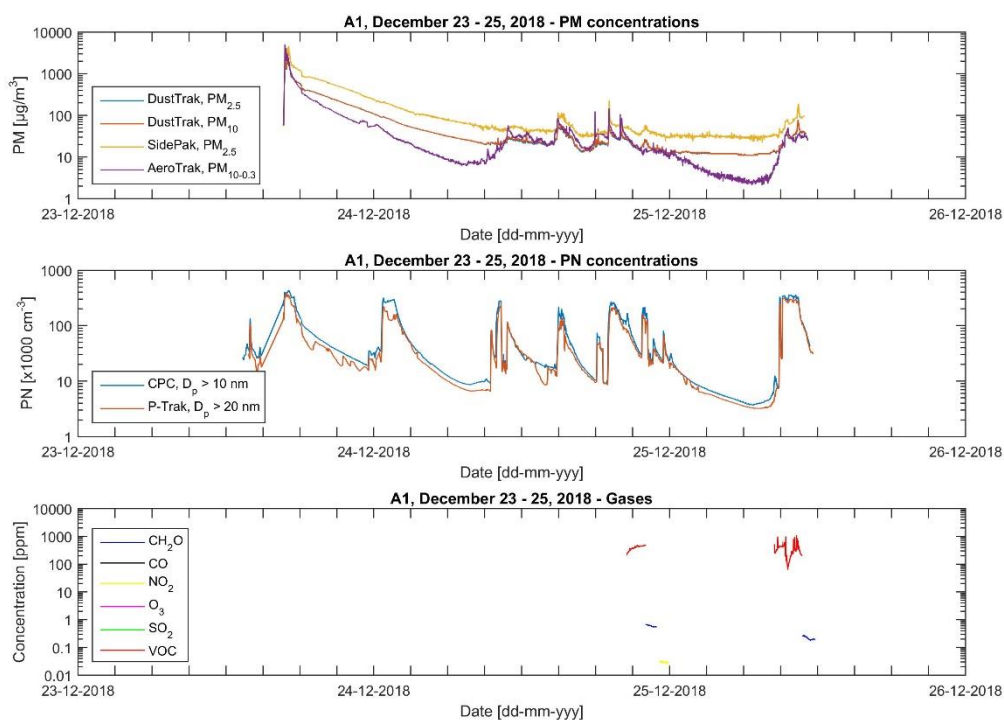

**Figure S1:** Aerosol concentrations inside apartment A1 during the winter campaign (December 23–25, 2018): (a) particle mass concentrations measured with the DustTrak ( $\text{PM}_{2.5}$  and  $\text{PM}_{10}$ ), SidePak ( $\text{PM}_{2.5}$ ), and AeroTrak ( $\text{PM}_{10-0.3}$ ); (b) particle number concentrations measured with the CPC 3007 ( $D_p$  0.01–2  $\mu\text{m}$ ) and P-Trak ( $D_p$  0.02–2  $\mu\text{m}$ ); and (c) selected gaseous pollutant concentrations measured with the AeroQual.

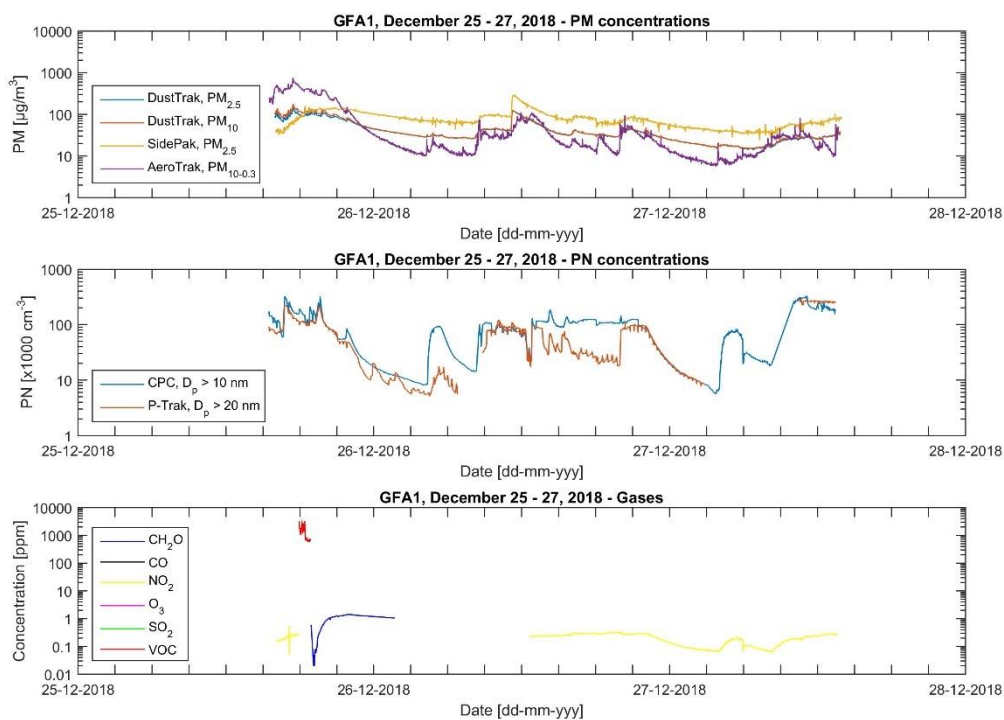

**Figure S2:** Aerosol concentrations inside ground floor apartment GFA1 during the winter campaign (December 25–27, 2018): (a) particle mass concentrations measured with the DustTrak ( $\text{PM}_{2.5}$  and  $\text{PM}_{10}$ ), SidePak ( $\text{PM}_{2.5}$ ), and AeroTrak ( $\text{PM}_{10-0.3}$ ); (b) particle number concentrations measured with the CPC 3007 ( $D_p$  0.01–2  $\mu\text{m}$ ) and P-Trak ( $D_p$  0.02–2  $\mu\text{m}$ ); and (c) selected gaseous pollutant concentrations measured with the AeroQual.

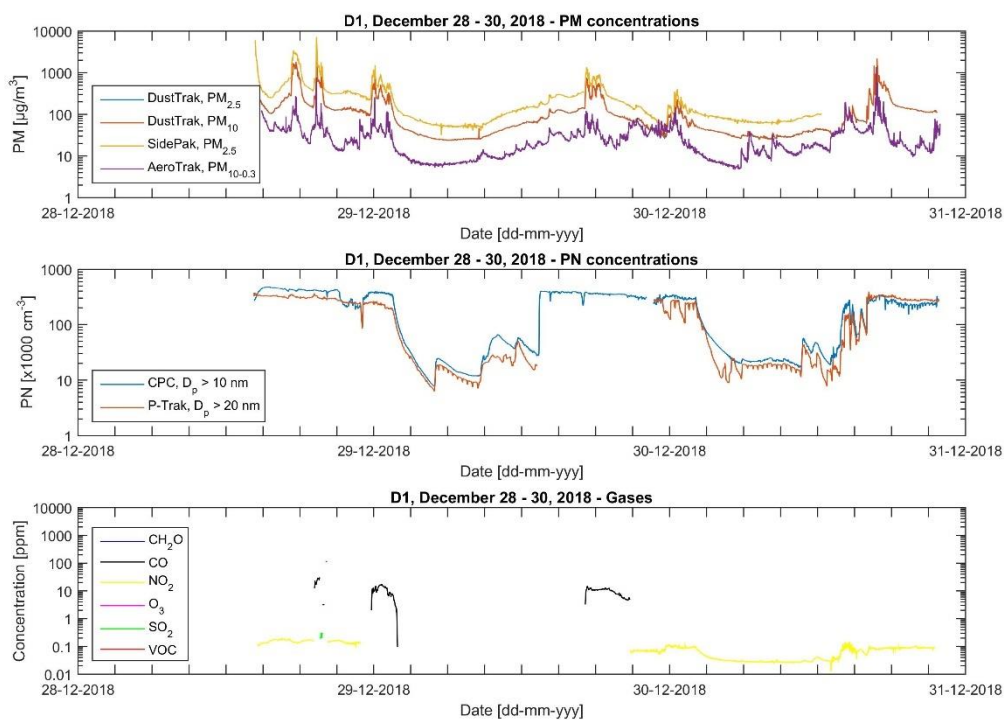

**Figure S3:** Aerosol concentrations inside duplex apartment D1 during the winter campaign (December 28–30, 2018): (a) particle mass concentrations measured with the DustTrak ( $\text{PM}_{2.5}$  and  $\text{PM}_{10}$ ), SidePak ( $\text{PM}_{2.5}$ ), and AeroTrak ( $\text{PM}_{10-0.3}$ ); (b) particle number concentrations measured with the CPC 3007 ( $D_p$  0.01–2  $\mu\text{m}$ ) and P-Trak ( $D_p$  0.02–2  $\mu\text{m}$ ); and (c) selected gaseous pollutant concentrations measured with the AeroQual.

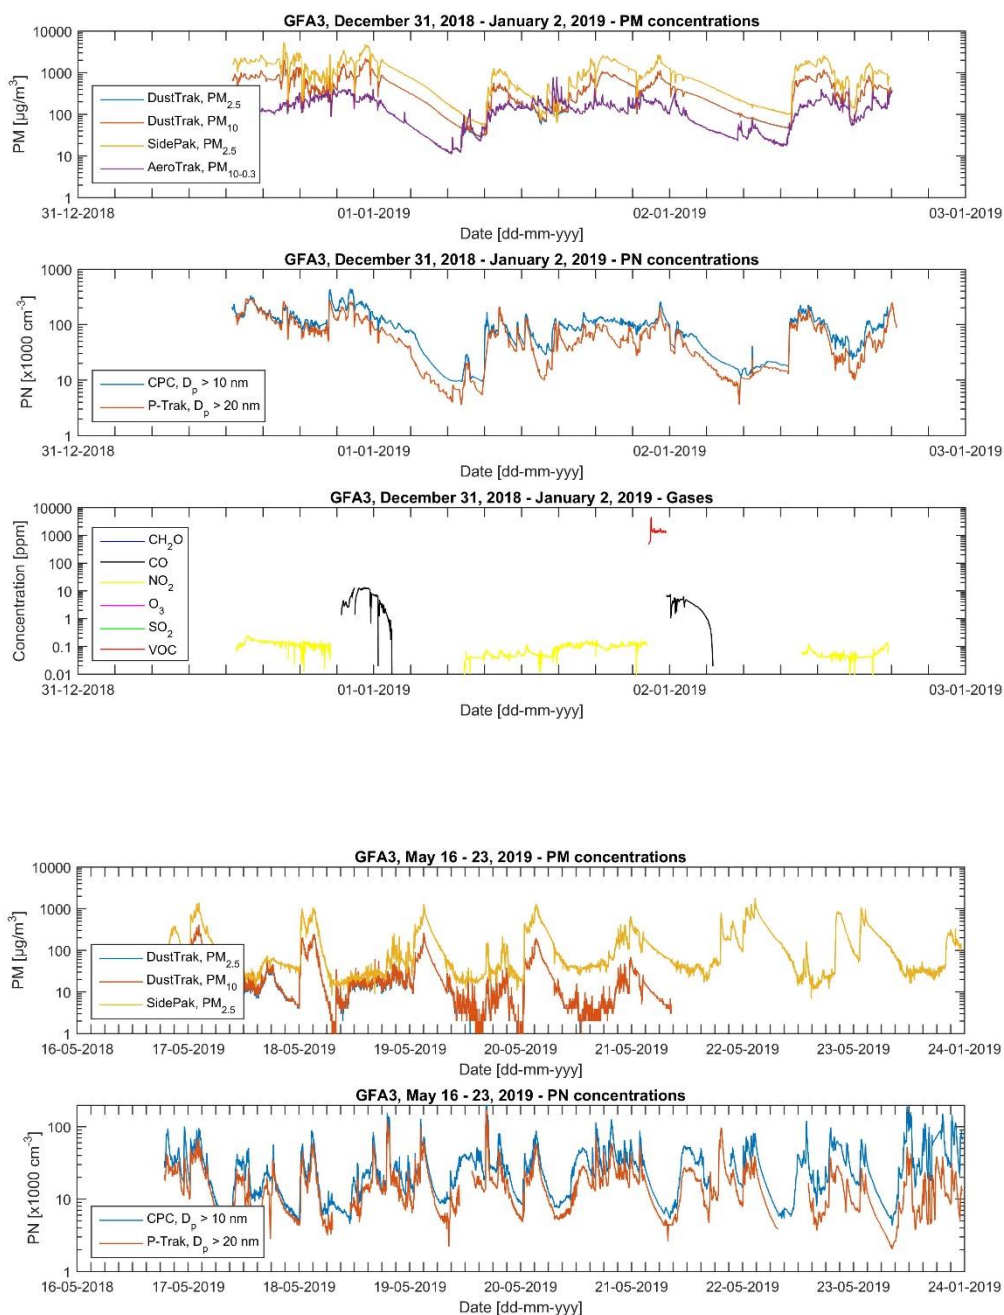

**Figure S4:** Aerosol concentrations inside ground floor apartment GFA3 during the winter campaign (December 31, 2018–January 2, 2019): (a) particle mass concentrations measured with the DustTrak ( $\text{PM}_{2.5}$  and  $\text{PM}_{10}$ ), SidePak ( $\text{PM}_{2.5}$ ), and AeroTrak ( $\text{PM}_{10-0.3}$ ); (b) particle number concentrations measured with the CPC 3007 ( $D_p$  0.01–2  $\mu\text{m}$ ) and P-Trak ( $D_p$  0.02–2  $\mu\text{m}$ ); and (c) selected gaseous pollutant concentrations measured with the AeroQual. Also summer campaign (May 16–23, 2019): (d) particle mass concentrations measured with the DustTrak ( $\text{PM}_{2.5}$  and  $\text{PM}_{10}$ ) and SidePak ( $\text{PM}_{2.5}$ ) and (e) particle number concentrations measured with the CPC 3007 ( $D_p$  0.01–2  $\mu\text{m}$ ) and P-Trak ( $D_p$  0.02–2  $\mu\text{m}$ ).

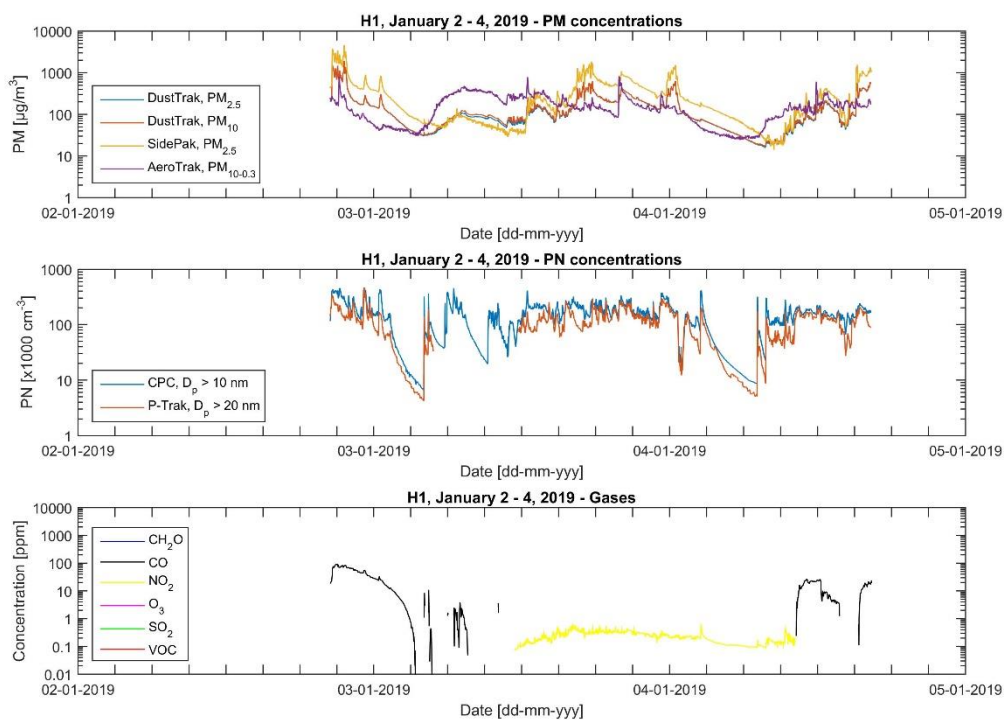

**Figure S5:** Aerosol concentrations inside house H1 during the winter campaign (January 2–4, 2019): (a) particle mass concentrations measured with the DustTrak ( $\text{PM}_{2.5}$  and  $\text{PM}_{10}$ ), SidePak ( $\text{PM}_{2.5}$ ), and AeroTrak ( $\text{PM}_{10-0.3}$ ); (b) particle number concentrations measured with the CPC 3007 ( $D_p$  0.01–2  $\mu\text{m}$ ) and P-Trak ( $D_p$  0.02–2  $\mu\text{m}$ ); and (c) selected gaseous pollutant concentrations measured with the AeroQual.

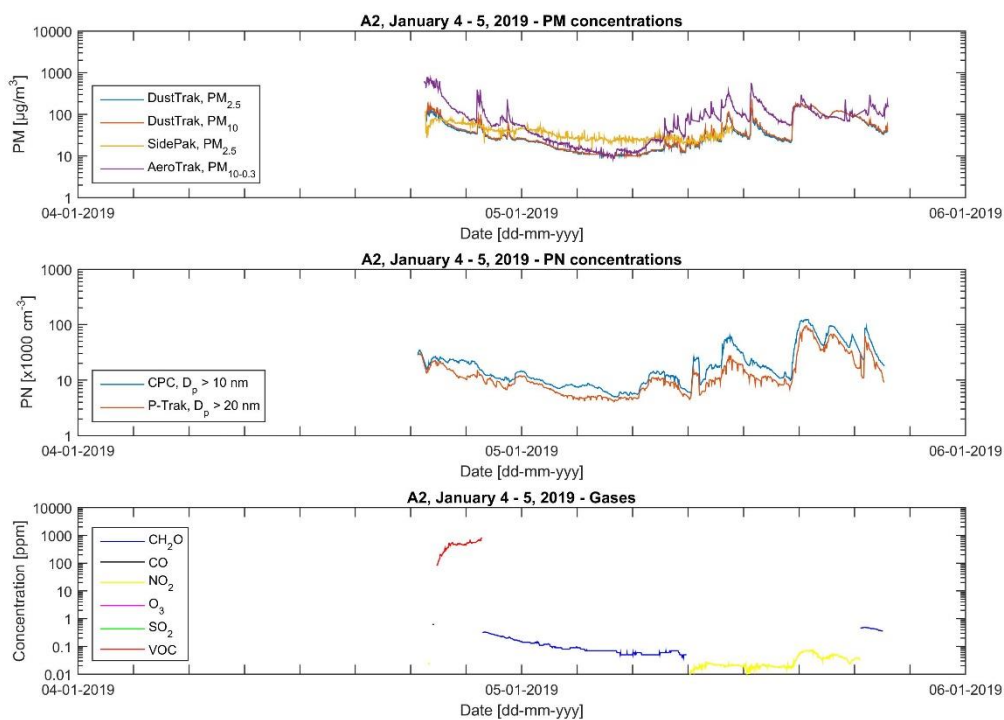

**Figure S6:** Aerosol concentrations inside apartment A2 during the winter campaign (January 4–5, 2019): (a) particle mass concentrations measured with the DustTrak ( $\text{PM}_{2.5}$  and  $\text{PM}_{10}$ ), SidePak ( $\text{PM}_{2.5}$ ), and AeroTrak ( $\text{PM}_{10-0.3}$ ); (b) particle number concentrations measured with the CPC 3007 ( $D_p$  0.01–2  $\mu\text{m}$ ) and P-Trak ( $D_p$  0.02–2  $\mu\text{m}$ ); and (c) selected gaseous pollutant concentrations measured with the AeroQual.

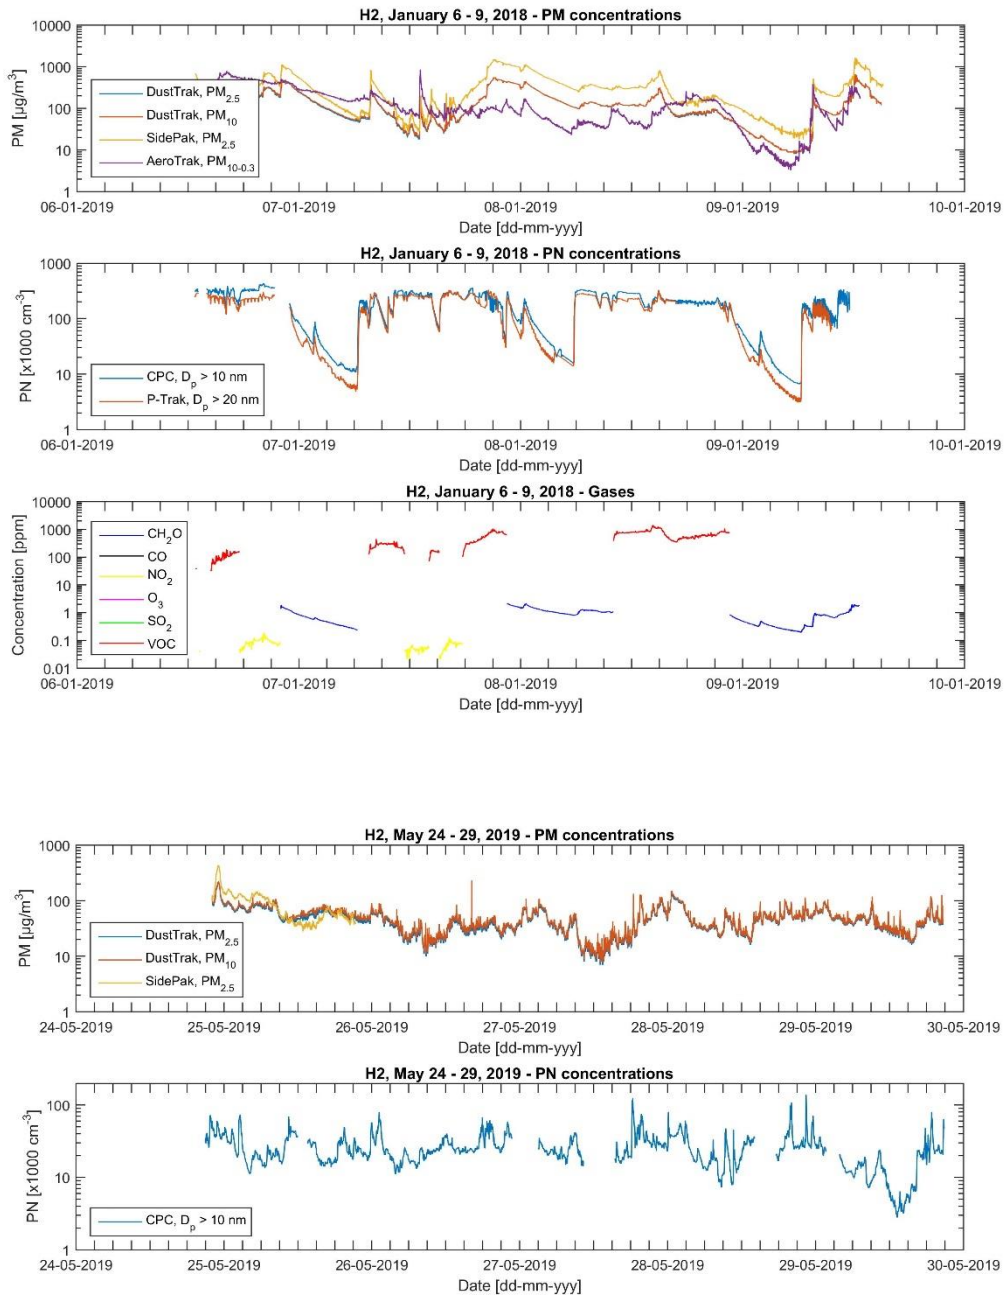

**Figure S7:** Aerosol concentrations inside house H2 during the winter campaign (January 6–9, 2019): (a) particle mass concentrations measured with the DustTrak ( $\text{PM}_{2.5}$  and  $\text{PM}_{10}$ ), SidePak ( $\text{PM}_{2.5}$ ), and AeroTrak ( $\text{PM}_{10-0.3}$ ); (b) particle number concentrations measured with the CPC 3007 ( $D_p$  0.01–2  $\mu\text{m}$ ) and P-Trak ( $D_p$  0.02–2  $\mu\text{m}$ ); and (c) selected gaseous pollutant concentrations measured with the AeroQual. Also summer campaign (May 24–19, 2019): (d) particle mass concentrations measured with the DustTrak ( $\text{PM}_{2.5}$  and  $\text{PM}_{10}$ ) and SidePak ( $\text{PM}_{2.5}$ ) and (e) particle number concentrations measured with the CPC 3007 ( $D_p$  0.01–2  $\mu\text{m}$ ).

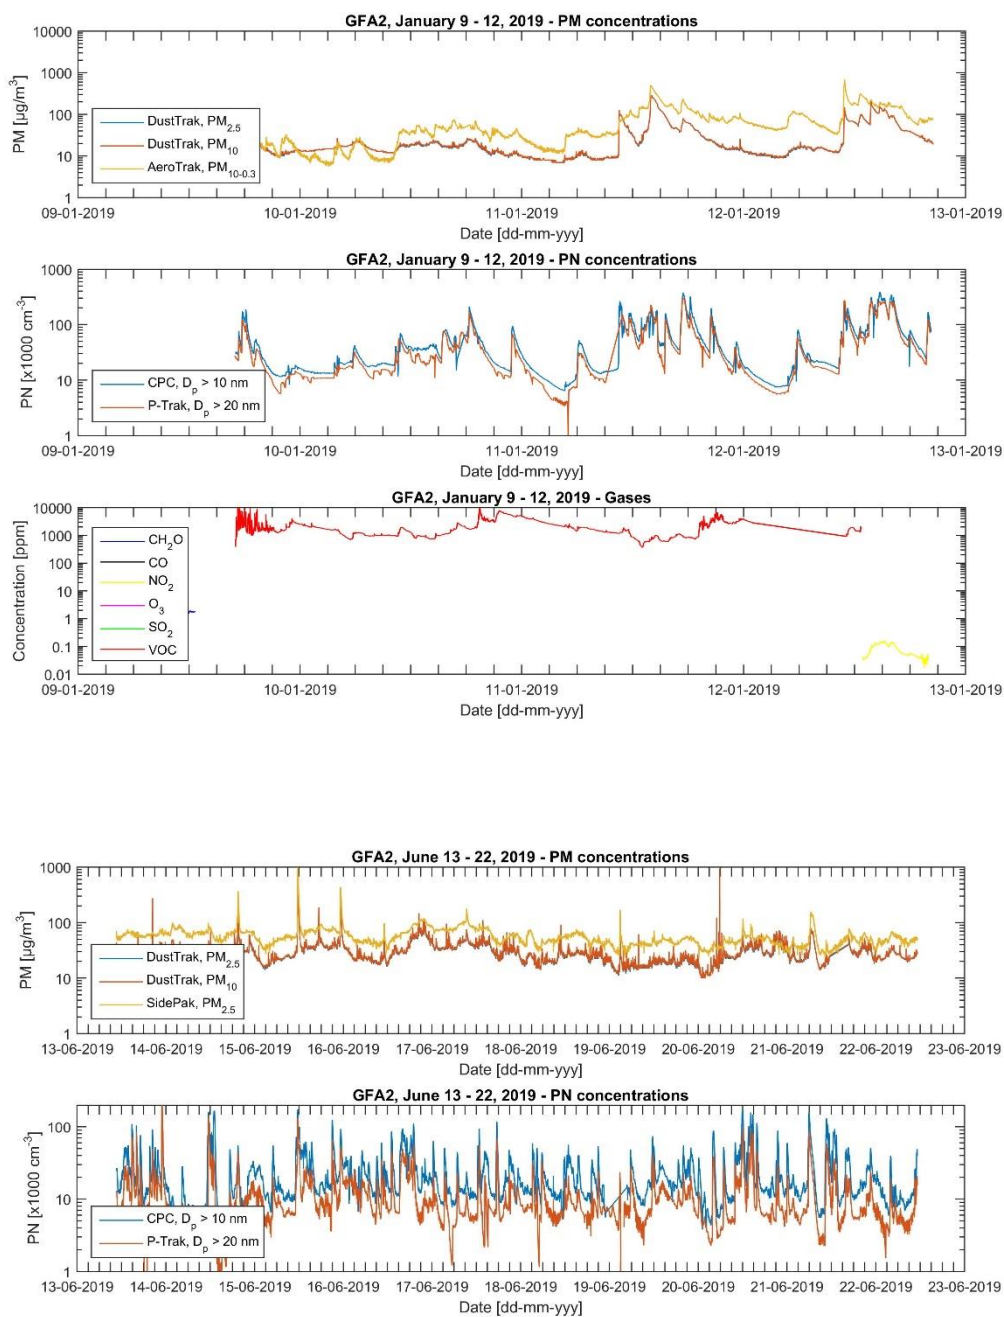

**Figure S8:** Aerosol concentrations inside ground floor apartment GFA2 during the winter campaign (January 9–12, 2019): (a) particle mass concentrations measured with the DustTrak (PM<sub>2.5</sub> and PM<sub>10</sub>) and AeroTrak (PM<sub>10-0.3</sub>); (b) particle number concentrations measured with the CPC 3007 (D<sub>p</sub> 0.01–2  $\mu\text{m}$ ) and P-Trak (D<sub>p</sub> 0.02–2  $\mu\text{m}$ ); and (c) selected gaseous pollutant concentrations measured with the AeroQual. Also summer campaign (May 13–22, 2019): (d) particle mass concentrations measured with the DustTrak (PM<sub>2.5</sub> and PM<sub>10</sub>) and SidePak (PM<sub>2.5</sub>) and (e) particle number concentrations measured with the CPC 3007 (D<sub>p</sub> 0.01–2  $\mu\text{m}$ ) and P-Trak (D<sub>p</sub> 0.02–2  $\mu\text{m}$ ).



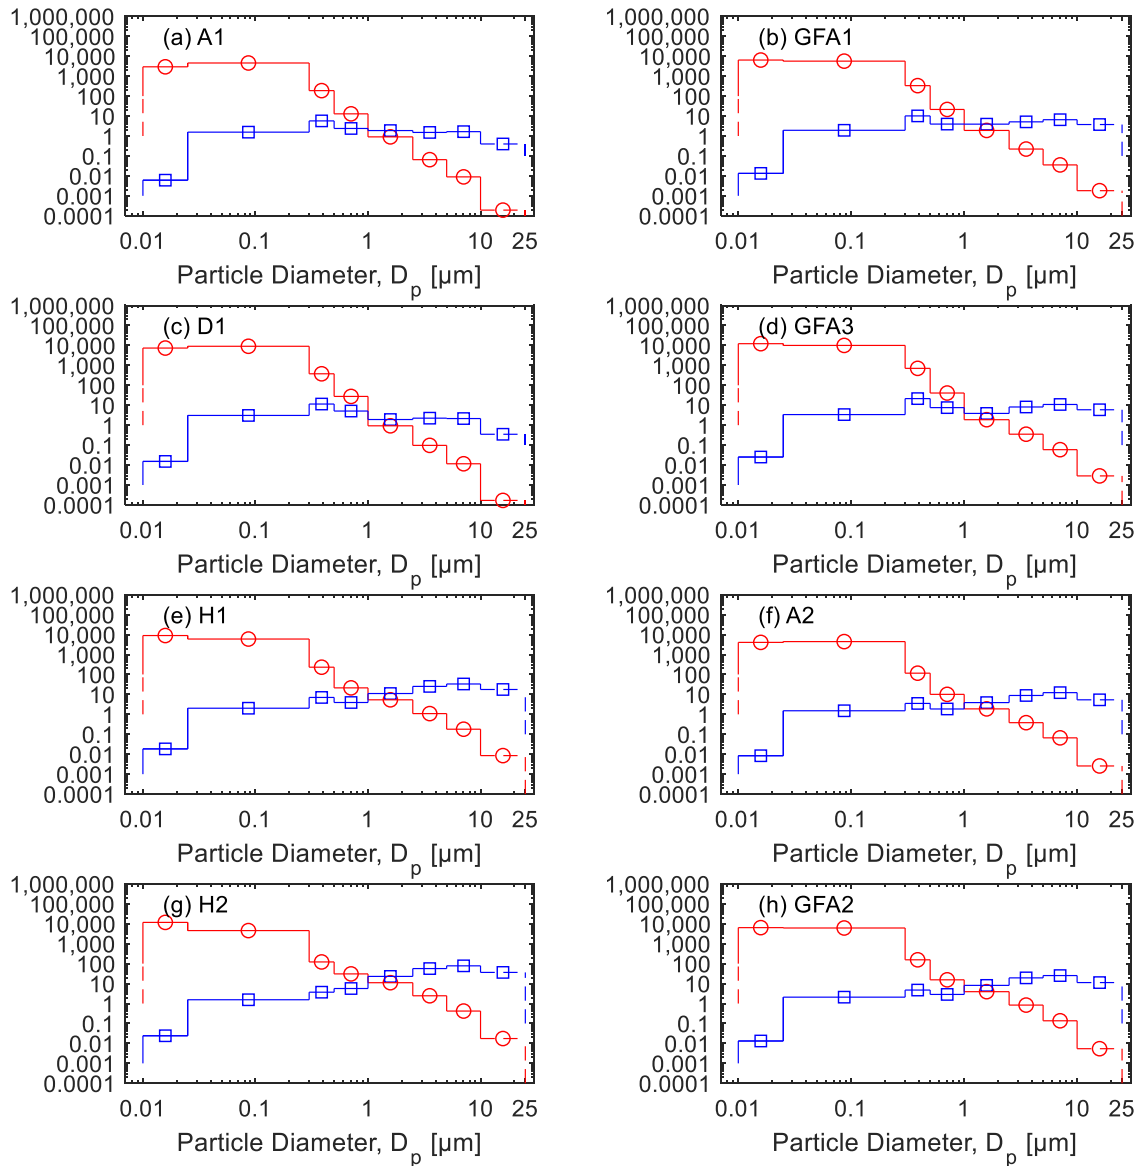

**Figure S9:** Mean particle number size distributions (red,  $dN/d\log(D_p)$ ,  $\text{cm}^{-3}$ ) and corresponding particle mass size distributions (blue,  $dM/d\log(D_p)$ ,  $\mu\text{g}/\text{m}^3$ ) in the absence of indoor activities during the winter campaign at each study site (a.-h.).

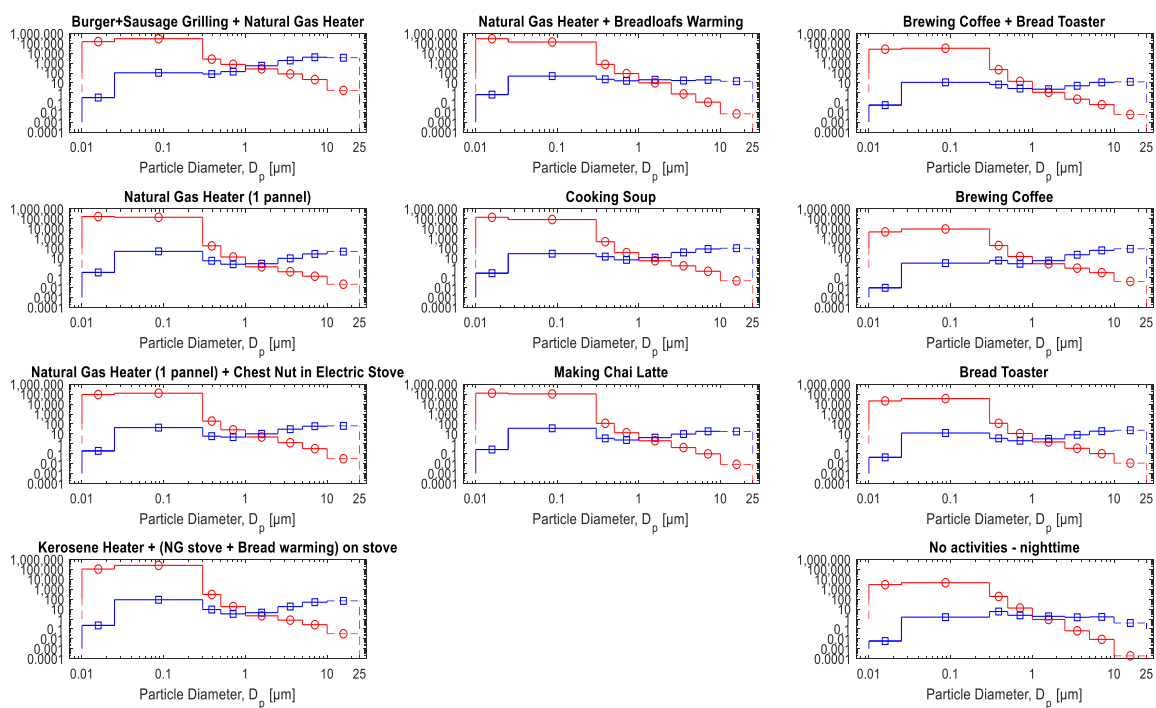

**Figure S10:** Mean particle number size distributions (red;  $dN/d\log(D_p)$ ) and particle mass size distributions (blue;  $dM/d\log(D_p)$ ) during selected activities reported inside Apartment A1 during the winter campaign (December 23–25, 2018).

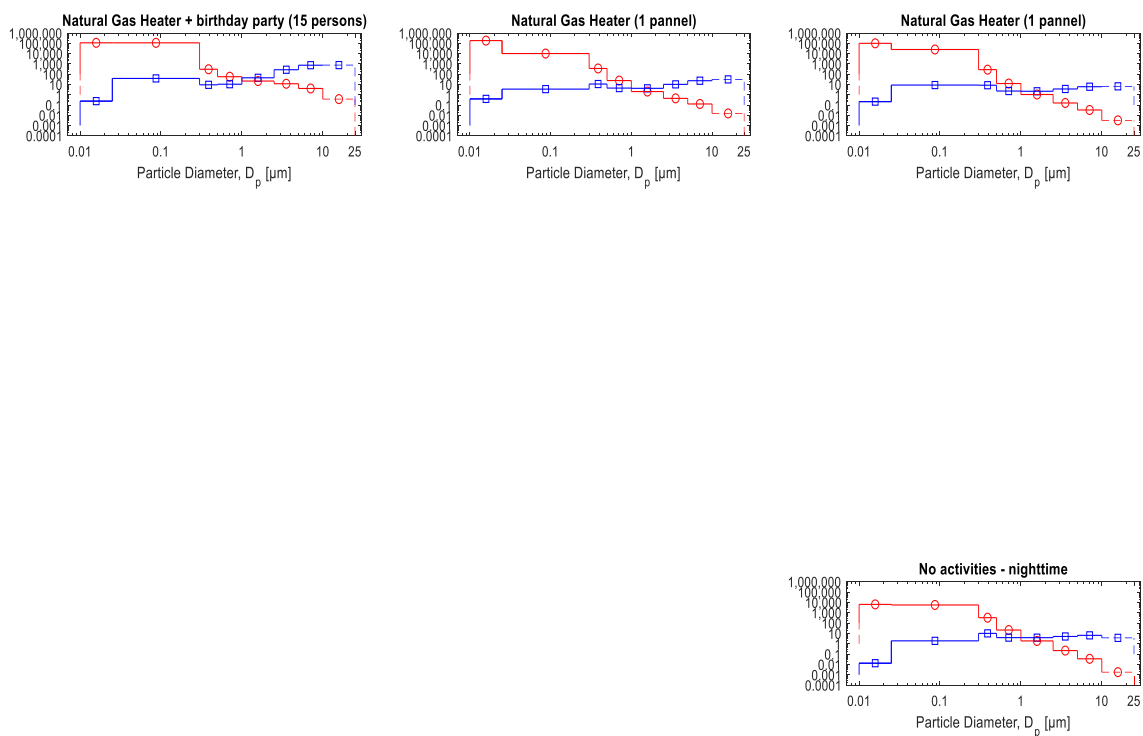

**Figure S11:** Mean particle number size distributions (red;  $dN/d\log(D_p)$ ) and particle mass size distributions (blue;  $dM/d\log(D_p)$ ) during selected activities reported inside ground floor apartment GFA1 during the winter campaign (December 25–27, 2018).

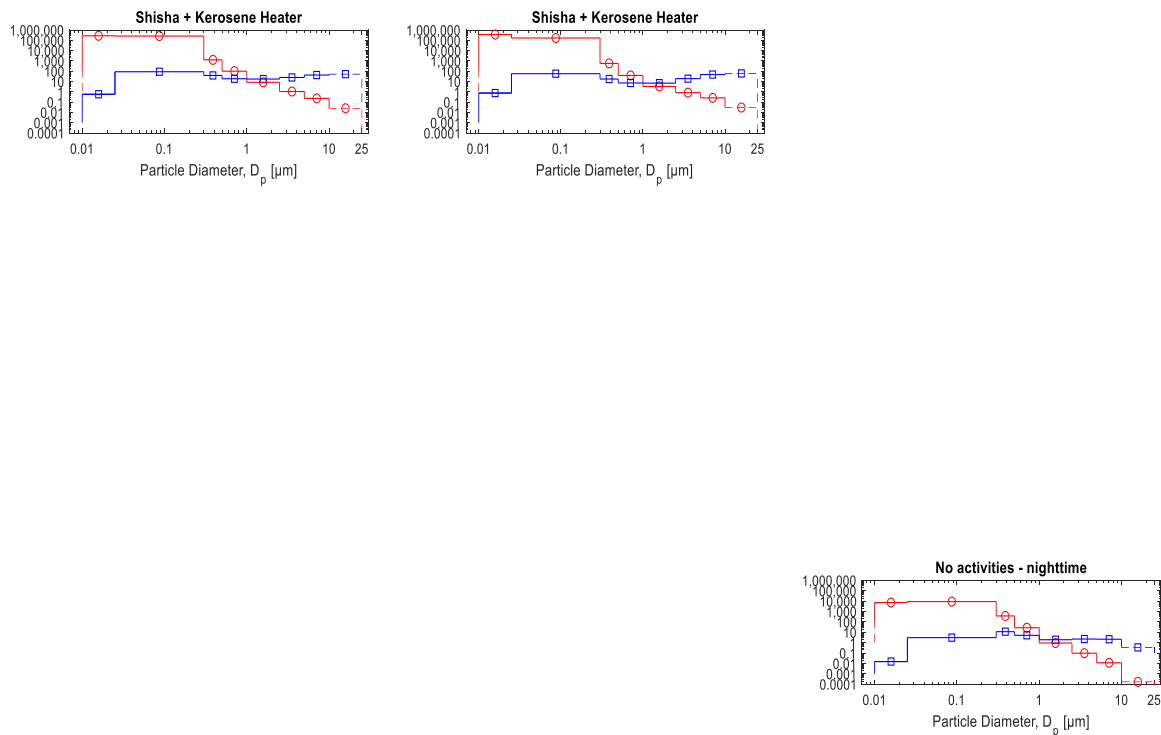

**Figure S12:** Mean particle number size distributions (red;  $dN/d\log(D_p)$ ) and particle mass size distributions (blue;  $dM/d\log(D_p)$ ) during selected activities reported inside duplex D1 during the winter campaign (December 28–30, 2018).

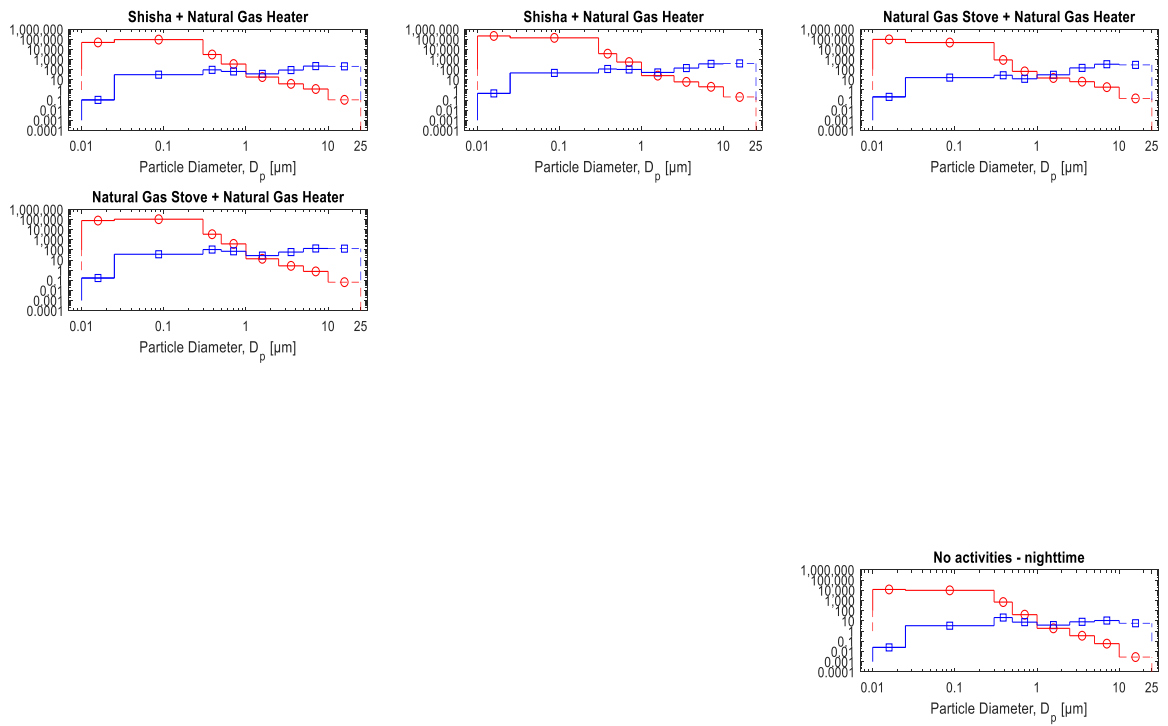

**Figure S13:** Mean particle number size distributions (red;  $dN/d\log(D_p)$ ) and particle mass size distributions (blue;  $dM/d\log(D_p)$ ) during selected activities reported inside ground floor apartment GFA3 during the winter campaign (December 31, 2018–January 2, 2019).

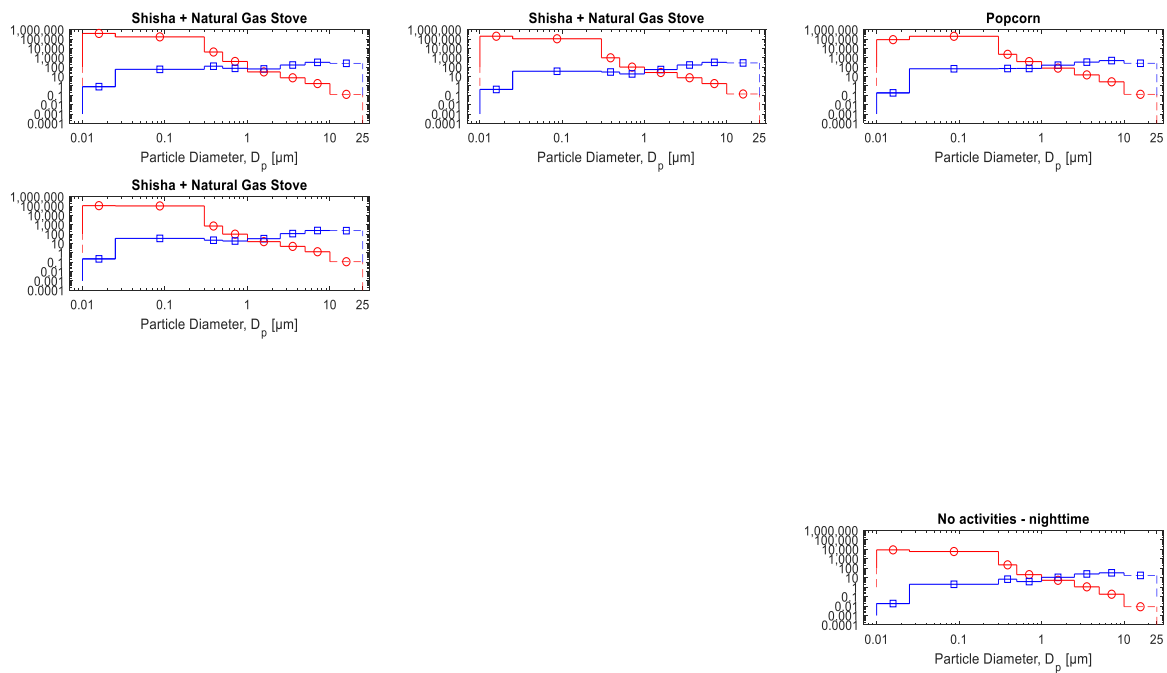

**Figure S14:** Mean particle number size distributions (red;  $dN/d\log(D_p)$ ) and particle mass size distributions (blue;  $dM/d\log(D_p)$ ) during selected activities reported inside house H1 during the winter campaign (January 2–4, 2019).

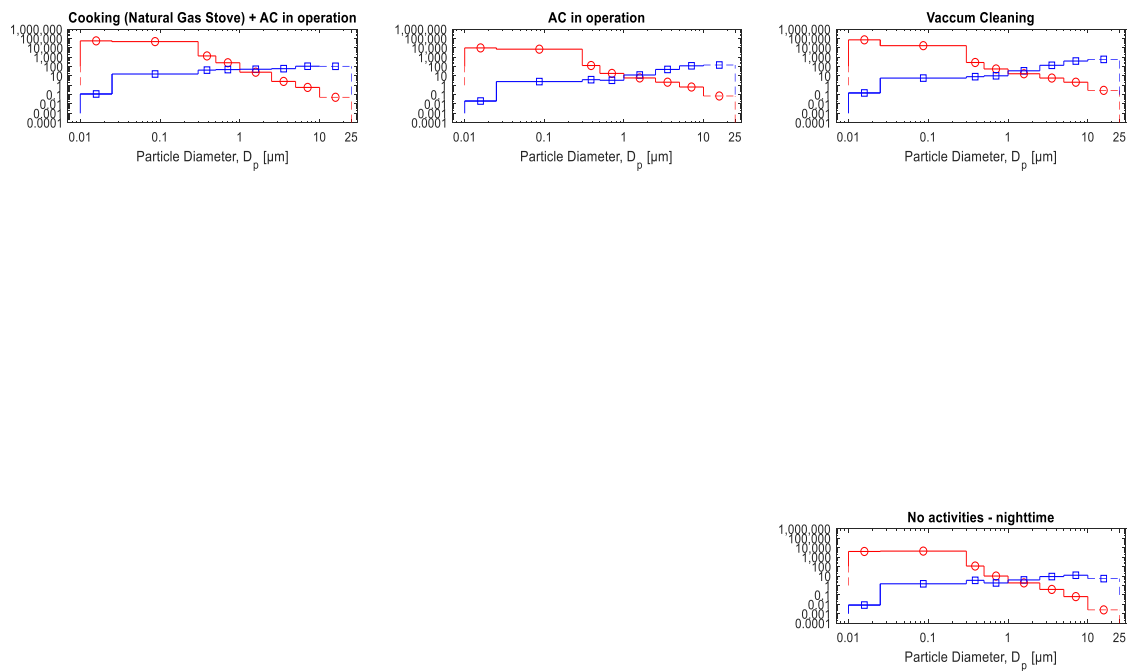

**Figure S15:** Mean particle number size distributions (red;  $dN/d\log(D_p)$ ) and particle mass size distributions (blue;  $dM/d\log(D_p)$ ) during selected activities reported inside apartment A2 during the winter campaign (January 4–5, 2019).

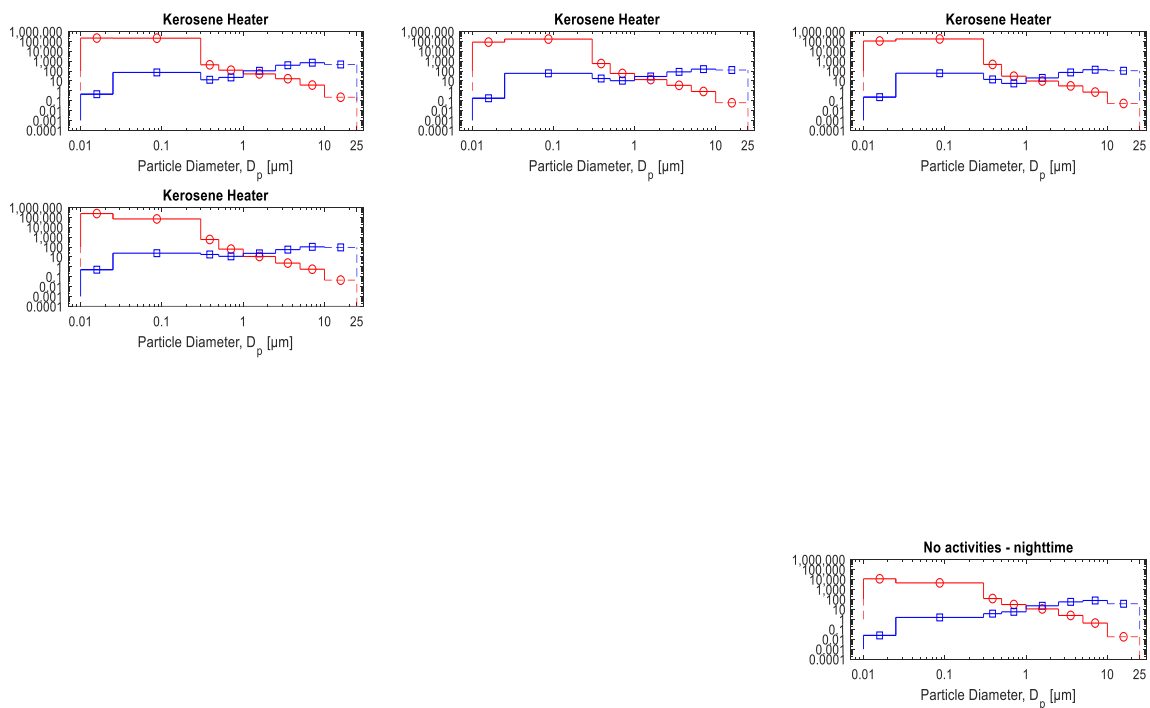

**Figure S16:** Mean particle number size distributions (red;  $dN/d\log(D_p)$ ) and particle mass size distributions (blue;  $dM/d\log(D_p)$ ) during selected activities reported inside house H2 during the winter campaign (January 6–9, 2019).



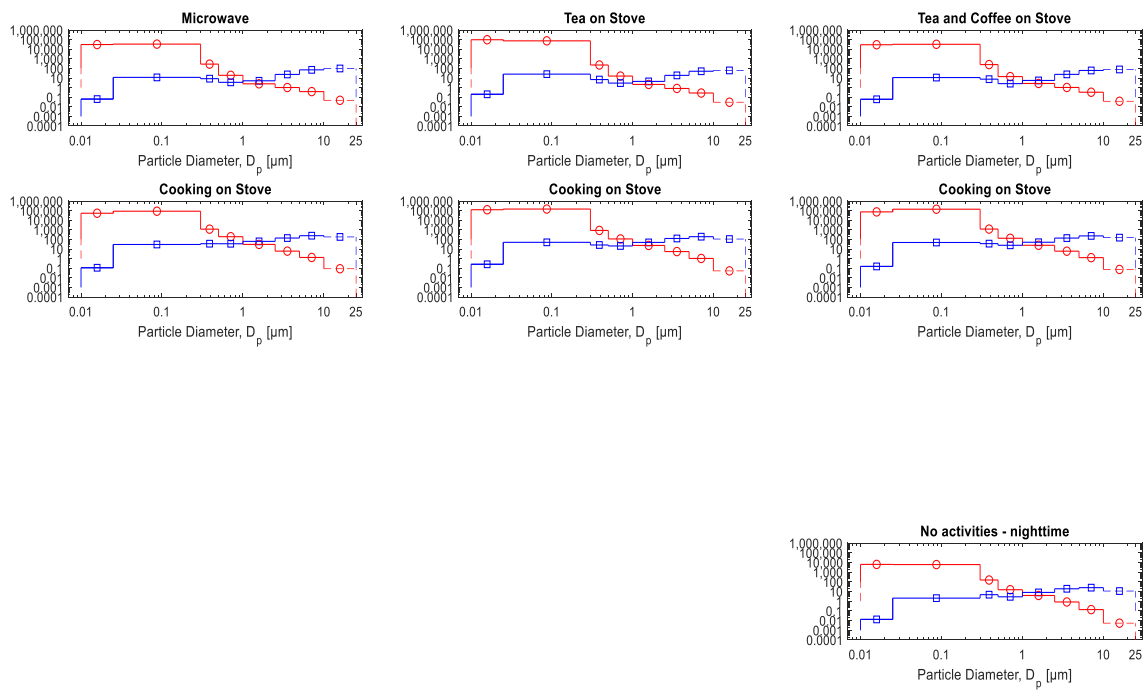

**Figure S17:** Mean particle number size distributions (red;  $dN/d\log(D_p)$ ) and particle mass size distributions (blue;  $dM/d\log(D_p)$ ) during selected activities reported inside ground floor apartment GFA2 during the winter campaign (January 9–12, 2019).

**Table S1:** Average particle mass and number concentrations (mean  $\pm$  stdev) during selected indoor activities.

| Combustion |       | Smoking |        | Non-Combustion |       | Additional Activity      | Location | $\Delta t$ [min] | PM <sub>2.5</sub> [ $\mu\text{g}/\text{m}^3$ ] |            |             | PM <sub>10</sub> [ $\mu\text{g}/\text{m}^3$ ] |            | PN <sub>1</sub> [ $\times 10^3 \text{ cm}^{-3}$ ] | PN <sub>10-1</sub> [ $\text{cm}^{-3}$ ] | Figure |
|------------|-------|---------|--------|----------------|-------|--------------------------|----------|------------------|------------------------------------------------|------------|-------------|-----------------------------------------------|------------|---------------------------------------------------|-----------------------------------------|--------|
| Heating    | Stove | Shisha  | Tobac. | Heating        | Other |                          |          |                  | PMD                                            | DustTrak   | SidePak     | PMD                                           | DustTrak   | PND                                               | PND                                     |        |
| √(NG)      |       |         |        |                |       |                          | A1       | 26               | 54 ± 26                                        | 20 ± 1     | 45 ± 2      | 64 ± 27                                       | 21 ± 1     | 214 ± 71                                          | 1 ± 0                                   | S10    |
| √(NG)      | √     |         |        |                |       | Bread warming up         | A1       | 59               | 70 ± 15                                        | 82 ± 6     | 188 ± 13    | 81 ± 17                                       | 83 ± 6     | 274 ± 38                                          | 4 ± 1                                   | S10    |
| √(NG)      | √     |         |        |                |       | Grilling burger/sausages | A1       | 27               | 378 ± 101                                      | 1731 ± 381 | 2925 ± 955  | 2094 ± 882                                    | 1830 ± 398 | 383 ± 82                                          | 131 ± 47                                | S10    |
| √(NG)      | √     |         |        |                |       |                          | GFA1     | 52               | 9 ± 2                                          | 31 ± 1     | 69 ± 5      | 19 ± 3                                        | 32 ± 1     | 85 ± 13                                           | 1 ± 0                                   | S11    |
| √(NG)      | √     |         |        |                |       |                          | GFA1     | 78               | 13 ± 7                                         | 18 ± 1     | 39 ± 2      | 16 ± 7                                        | 18 ± 1     | 68 ± 11                                           | <i>null</i>                             | S11    |
| √(NG)      | √     |         | √      |                |       |                          | GFA3     | 46               | 40 ± 8                                         | 114 ± 8    | 194 ± 30    | 189 ± 57                                      | 122 ± 8    | 91 ± 18                                           | 8 ± 2                                   | S13    |
| √(NG)      | √     |         | √      |                |       |                          | GFA3     | 145              | 98 ± 26                                        | 587 ± 225  | 1359 ± 525  | 158 ± 51                                      | 590 ± 226  | 151 ± 37                                          | 6 ± 3                                   | S13    |
| √(NG)      | √     | √       |        |                |       | Making popcorn           | H1       | 39               | 173 ± 41                                       | 343 ± 63   | 795 ± 134   | 424 ± 152                                     | 345 ± 63   | 245 ± 53                                          | 36 ± 12                                 | S14    |
| √(NG)      | √     |         |        |                | √     | 15 people                | GFA1     | 270              | 65 ± 17                                        | 98 ± 14    | 88 ± 37     | 374 ± 91                                      | 115 ± 16   | 169 ± 52                                          | 13 ± 3                                  | S11    |
| √(K)       | √     |         |        |                |       |                          | H2       | 525              | 130 ± 15                                       | 159 ± 71   | 266 ± 199   | 458 ± 110                                     | 172 ± 71   | 318 ± 53                                          | 27 ± 9                                  | S16    |
| √(K)       | √     |         |        |                |       |                          | H2       | 1064             | 82 ± 24                                        | 150 ± 155  | 370 ± 428   | 154 ± 60                                      | 152 ± 154  | 220 ± 78                                          | 7 ± 5                                   | S16    |
| √(K)       | √     |         |        |                |       |                          | H2       | 979              | 78 ± 17                                        | 112 ± 42   | 278 ± 123   | 141 ± 36                                      | 113 ± 42   | 236 ± 52                                          | 5 ± 3                                   | S16    |
| √(K)       | √     |         |        |                |       |                          | H2       | 324              | 43 ± 17                                        | 84 ± 48    | 222 ± 126   | 91 ± 60                                       | 84 ± 48    | 174 ± 62                                          | 5 ± 5                                   | S16    |
| √(K)       | √     |         |        |                |       |                          | A1       | 84               | 99 ± 13                                        | 35 ± 12    | 79 ± 31     | 119 ± 14                                      | 36 ± 12    | 320 ± 45                                          | 1 ± 0                                   | S10    |
| √(K)       | √     | √       |        |                |       |                          | D1       | 631              | 118 ± 33                                       | 289 ± 336  | 629 ± 680   | 139 ± 42                                      | 290 ± 336  | 397 ± 60                                          | 4 ± 8                                   | S12    |
| √(K)       | √     | √       |        |                |       |                          | D1       | 750              | 72 ± 24                                        | 126 ± 114  | 255 ± 197   | 92 ± 30                                       | 127 ± 114  | 330 ± 46                                          | 2 ± 1                                   | S12    |
| √(NG)      | √     | √x2     |        |                |       |                          | H1       | 64               | 139 ± 27                                       | 995 ± 278  | 2377 ± 696  | 288 ± 114                                     | 1000 ± 277 | 343 ± 72                                          | 15 ± 10                                 | S14    |
| √(NG)      | √     | √       |        |                |       |                          | H1       | 369              | 75 ± 18                                        | 183 ± 127  | 414 ± 398   | 226 ± 76                                      | 189 ± 125  | 198 ± 47                                          | 14 ± 5                                  | S14    |
| √(NG)      | √     | √       |        |                |       |                          | H1       | 520              | 61 ± 26                                        | 124 ± 126  | 261 ± 312   | 168 ± 60                                      | 128 ± 127  | 154 ± 39                                          | 8 ± 3                                   | S14    |
| √(NG)      | √     | √       | √      |                |       |                          | GFA3     | 123              | 92 ± 33                                        | 819 ± 435  | 1956 ± 1095 | 189 ± 46                                      | 825 ± 435  | 123 ± 34                                          | 9 ± 6                                   | S13    |
| √(NG)      | √     | √x2     | √      |                |       |                          | GFA3     | 221              | 132 ± 31                                       | 987 ± 484  | 2180 ± 1048 | 291 ± 61                                      | 995 ± 483  | 242 ± 77                                          | 13 ± 5                                  | S13    |
|            | √     |         |        |                |       | Cooking soup             | A1       | 38               | 40 ± 11                                        | 49 ± 5     | 93 ± 14     | 76 ± 17                                       | 51 ± 5     | 144 ± 40                                          | 3 ± 1                                   | S10    |
|            | √     |         |        |                |       | Making chai latte        | A1       | 34               | 41 ± 13                                        | 21 ± 3     | 47 ± 5      | 49 ± 13                                       | 22 ± 3     | 160 ± 44                                          | 1 ± 0                                   | S10    |
|            | √     |         |        | √(C)           |       | Intensive cooking        | GFA2     | 174              | 76 ± 41                                        | 119 ± 77   | --          | 191 ± 75                                      | 120 ± 77   | 116 ± 29                                          | 14 ± 10                                 | S17    |
|            | √     |         |        | √(C)           |       | Intensive cooking        | GFA2     | 82               | 85 ± 32                                        | 61 ± 8     | --          | 181 ± 56                                      | 61 ± 8     | 207 ± 78                                          | 11 ± 3                                  | S17    |
|            | √     |         |        | √(C)           |       | Intensive cooking        | GFA2     | 348              | 88 ± 31                                        | 93 ± 30    | --          | 201 ± 32                                      | 94 ± 30    | 183 ± 91                                          | 12 ± 2                                  | S17    |
|            | √     |         |        | √(C)           |       | Making tea               | GFA2     | 43               | 31 ± 10                                        | 30 ± 2     | --          | 52 ± 11                                       | 31 ± 2     | 117 ± 43                                          | 1 ± 0                                   | S17    |
|            | √     |         |        | √(C)           |       | Making tea and coffee    | GFA2     | 73               | 16 ± 4                                         | 17 ± 1     | --          | 42 ± 10                                       | 17 ± 2     | 46 ± 13                                           | 1 ± 0                                   | S17    |
|            | √     |         |        | √(AC)          |       | Intensive cooking        | A2       | 194              | 62 ± 19                                        | 125 ± 29   | --          | 112 ± 40                                      | 127 ± 29   | 74 ± 28                                           | 11 ± 5                                  | S15    |
|            |       |         |        | √(AC)          |       | AC operation             | A2       | 189              | 10 ± 3                                         | 21 ± 6     | 26 ± 4      | 61 ± 28                                       | 23 ± 8     | 12 ± 4                                            | 3 ± 1                                   | S15    |
|            |       |         |        | √(C)           | √     | Microwave                | GFA2     | 19               | 17 ± 5                                         | 37 ± 3     | --          | 44 ± 11                                       | 37 ± 3     | 47 ± 17                                           | 1 ± 0                                   | S17    |
|            |       |         |        |                | √     | Vacuum Cleaner           | A2       | 38               | 25 ± 7                                         | 61 ± 23    | 40 ± 7      | 181 ± 64                                      | 67 ± 25    | 47 ± 15                                           | 9 ± 3                                   | S15    |
|            |       |         |        |                | √     | Brewing Coffee           | A1       | 38               | 7 ± 2                                          | 20 ± 2     | 35 ± 2      | 31 ± 21                                       | 21 ± 3     | 11 ± 5                                            | 1 ± 1                                   | S10    |

|  |  |  |  |  |   |                          |    |    |         |        |        |         |        |         |             |     |
|--|--|--|--|--|---|--------------------------|----|----|---------|--------|--------|---------|--------|---------|-------------|-----|
|  |  |  |  |  | √ | Brewing Coffee + Toaster | A1 | 19 | 14 ± 10 | 22 ± 1 | 52 ± 3 | 18 ± 11 | 22 ± 1 | 42 ± 29 | <i>null</i> | S10 |
|  |  |  |  |  | √ | Toaster                  | A1 | 17 | 15 ± 6  | 14 ± 1 | 32 ± 2 | 23 ± 7  | 14 ± 1 | 44 ± 21 | 8 ± 2       | S10 |
